# Supplementary material for: Excellent catalytic properties of luminescent Cu@Cu2S nanozymes and their antibacterial applications
Source: Royal Society of Chemistry journal article supplement (doi:10.1039/d1cc06671d), 2022-01-01
Supplement: d1cc06671d1.pdf [file d1cc06671d1.pdf]

## Electronic Supplementary Information

### Excellent catalytic properties of luminescent Cu@Cu<sub>2</sub>S nanozymes and antibacterial application

Yuezhen He,<sup>\*a</sup> Manyue Yin,<sup>a</sup> Jian Sun,<sup>a</sup> Jie Chen,<sup>b</sup> Kuimin Jiao,<sup>a</sup> Jiantao Wen,<sup>a</sup> Yan Chen,<sup>a</sup> Baojuan Wang,<sup>\*b</sup> Feng Gao,<sup>a</sup> and Lun Wang,<sup>a</sup>

*a. College of Chemistry and Materials Science, Anhui Normal University, Key Laboratory of Functional Molecular Solids, Ministry of Education, Anhui Laboratory of Molecular-Based Materials, Anhui Key Laboratory of Chemo-Biosensing, Wuhu 241002, China*

*b. College of Life Sciences, Anhui Normal University, Anhui Provincial Key Laboratory of Molecular Enzymology and Mechanism of Major Diseases and Key Laboratory of Biomedicine in Gene Diseases and Health of Anhui Higher Education Institutes, Wuhu 241000, China*

#### 1 Experimental section

**Chemicals and Apparatus:** L-ascorbic acid (AA), glutathione (GSH, Reduced) and Copper chloride were brought from Aladdin chemistry Co. Ltd (Shanghai, China). Other reagents were purchased from Sinopharm Chemical Reagent Co. Ltd (Shanghai, China). All the other reagents were analytical reagent grade and were used without further purification. Ultrapure water purified with a Millipore system (18.2 MΩ) was used throughout the experiments.

The morphology of Cu<sub>2</sub>O@CuO and Cu@Cu<sub>2</sub>S nanozymes were recorded with a HT-7700 transmission electron microscope (Hitachi, Japan). High-resolution transmission electron microscope (HRTEM) were captured by using a Tecnai G220S-TWIN transmission electron microscope (FEI, USA). The fluorescence spectra were obtained by a Lumina Fluorescence Spectrometer (Thermo Fisher Scientific, Korea). UV-vis absorption spectra were carried out on a Hitachi UV-2910 spectrophotometer (Hitachi, Japan).

**Synthesis of Cu<sub>2</sub>O@CuO nanozymes:** 0.6 mmol of NaOH and 0.6 mmol of AA were dissolved in 50 mL of water to form a clear solution. 10 mL of the mixture was added dropwise

into 15 mL of  $\text{CuCl}_2$  aqueous solution (0.025mM) under stirring to form  $\text{Cu}_2\text{O}@CuO$  nanoparticles. With the aid of AA, the  $\text{CuO}$  nanoparticles were spontaneously formed in the chemical precipitation process, and parts of  $\text{CuO}$  were reduced to  $\text{Cu}_2\text{O}$  by excess AA. The preparation of  $\text{Cu}_2\text{O}@CuO$  in the chemical precipitation was detailed in Eq S1.

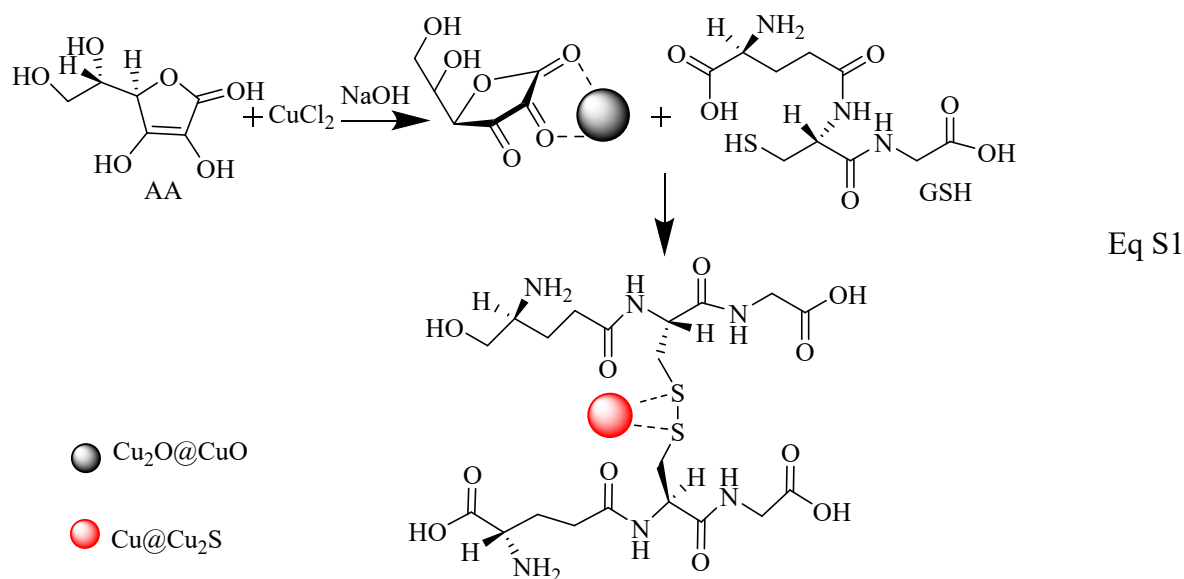

**Synthesis of  $\text{Cu}@Cu_2S$  nanozymes:** The aqueous solution of GSH (20 mL, 40 mM) was mixed with the as prepared  $\text{Cu}_2\text{O}@CuO$  nanoparticles (3.5 mL), and stirring for 20 min at room temperature, until white precipitation was generated. The obtained  $\text{Cu}@Cu_2S$  nanozymes were collected by centrifugation at 8000 rpm for 10 min, and washed with ethanol three times. The product was dispersed again into the water and stored at 4 °C for further use. The  $\text{Cu}_2S$  nanoparticles were prepared from  $\text{Cu}_2\text{O}@CuO$  nanoparticles in the ligand exchange process due to the stronger affinity of  $\text{Cu-S}$  than of  $\text{Cu-O}$ , and only a tiny amount of  $\text{Cu}_2S$  nanoparticles were reduced to  $\text{Cu}$  nanoparticles by GSH. Only a tiny amount of  $\text{Cu}_2S$  nanoparticles were reduced to  $\text{Cu}$  nanoparticles by GSH. The preparation of  $\text{Cu}@Cu_2S$  in the ligand exchange process was detailed in Eq S1.

**Oxidase-like of two Cu-base nanozymes:** The oxidase-like activity of the Cu<sub>2</sub>O@CuO nanozymes and Cu@Cu<sub>2</sub>S nanozymes was evaluated by using *p*-terephthalic acid (*p*TA) as a substrates. *p*TA (50 mM) was dissolved in NaOH aqueous solution (1 M). The Cu<sub>2</sub>O@CuO nanodots (0.5 mM) or Cu@Cu<sub>2</sub>S nanodots (0.5 mM) were added to the *p*TA solutions (0.5 mM). After mixing for 30 min, the fluorescent spectrums were detected under 312 nm wavelength excitation.

**Peroxidase-like activity of two Cu-base nanozymes:** The peroxidase-like activity of the Cu<sub>2</sub>O@CuO nanozymes and Cu@Cu<sub>2</sub>S nanozymes was evaluated by using the oxidation of *p*TA and degradation of methylene blue (MB) in the presence of H<sub>2</sub>O<sub>2</sub>. For *p*TA oxidation, *p*TA (0.5 mM), H<sub>2</sub>O<sub>2</sub> (1 mM), and Cu<sub>2</sub>O@CuO nanodots (0.5 mM) or Cu@Cu<sub>2</sub>S nanodots (0.5 mM) were mixed in the 25 mM phosphate buffer solutions (pH 5.0). After mixing for 10 min, the fluorescent spectrums were detected under 312 nm wavelength excitation. For MB degradation, MB (10 µg mL<sup>-1</sup>), H<sub>2</sub>O<sub>2</sub> (1 mM), and Cu<sub>2</sub>O@CuO nanodots (0.5 mM) or Cu@Cu<sub>2</sub>S nanodots (0.5 mM) were mixed in the 25 mM phosphate buffer solutions (pH 7.4). ·OH-induced MB degradation was measured by UV-vis absorption spectrum in the range of 500 nm to 800 nm.

**Minimum inhibitory concentration:** *Staphylococcus aureus* (*S. aureus*) and *Escherichia coli* (*E. coli*) were chosen as the representatives of Gram-positive and Gram-negative bacteria in the test. The bacterium were cultured at 37 °C and 180 rpm in 5 mL of Luria–Bertani (LB) liquid medium until the OD<sub>600</sub> reached 0.6. First, we test the antibacterial activity of Cu<sub>2</sub>O@CuO and Cu@Cu<sub>2</sub>S nanozymes, the results (Fig. S15) showed that the antibacterial activity of Cu@Cu<sub>2</sub>S nanozymes was much stronger than that of Cu<sub>2</sub>O@CuO nanozymes, so we focused on Cu@Cu<sub>2</sub>S nanozymes in following experiment.

Various concentrations of Cu@Cu<sub>2</sub>S nanozymes (0, 0.46, 0.94, 1.88, 3.75, 7.5, 15.0, 30.0 and 60.0 µg mL<sup>-1</sup>) were separately added to the bacterium with continuous shaking at 180 rpm, then growth of organisms was observed by measuring OD at 600 nm until 24 h.

**Bacterial growth curves test:** The growth curves of the bacterium (including *S. aureus* and *E. coli*) were determined by consecutive double dilution method with different doses of Cu@Cu<sub>2</sub>S nanozymes (0, 0.46, 0.94, 1.88, 3.75, 7.5, 15.0, 30.0 and 60.0 µg mL<sup>-1</sup>). At first, the concentration of bacterium were adjusted to 0.6 of OD<sub>600</sub>. The different doses of Cu@Cu<sub>2</sub>S nanozymes were added to the bacteria with continuous shaking at 180 rpm, then growth of organisms was observed by measuring OD at 600 nm every two hours until 24 h.

**Inhibition zone test:** The antibacterial performance of Cu@Cu<sub>2</sub>S nanozymes was assessed by inhibition zone method. The bacterium were cultured until whose optical density (OD<sub>600</sub>) reached 0.6. Then, 100 µL of the bacterial suspension was uniformly spreaded to sterile LB agar plates. Subsequently, 200 µL various concentrations of Cu@Cu<sub>2</sub>S nanozymes (0.25, 0.50, 1.0 mg mL<sup>-1</sup>), and PBS buffer were separately added to four sterilized Oxford cup, and the plate was incubated at 37 °C. The inhibition diameters of the zone were detected after incubation for 24 h. The experiment of Oxford cup was repeated three times independently.

**Bacterial imaging with Cu@Cu<sub>2</sub>S nanozymes:** *S. aureus* or *E. coli* solution (OD<sub>600</sub> = 0.6) were cultured in 1 mL LB liquid medium with 10 mg mL<sup>-1</sup> Cu@Cu<sub>2</sub>S nanozymes for 2.5 h at 37 °C and 180 rpm. The bacterium were separately collected by centrifugation at 8000 rpm for 5 min and re-dispersed in 1mL of PBS buffer solution (pH=7.4). Fluorescent images were taken using an upright fluorescence microscope Axio Image A2 (Zeiss, Germany).

**Morphological observation for bacterium by SEM:** The bacterium (*S. aureus* and *E. coli*) were severally incubated in LB liquid medium with Cu@Cu<sub>2</sub>S nanozymes (60.0 µg mL<sup>-1</sup>) for

4 h, while the control group was treated without Cu@Cu<sub>2</sub>S nanozymes. The bacteria was collected by 8000 rpm centrifugation for 10 min, and cleared by PBS buffer for three times. Next, we added 2.5% glutaraldehyde to fix the bacteria for 30 min. Then the bacteria was dehydrated with gradient ethanol. Finally, it was transferred to the clean silicon slice to dry by vacuum and sputter-coated with gold before observed by SEM.

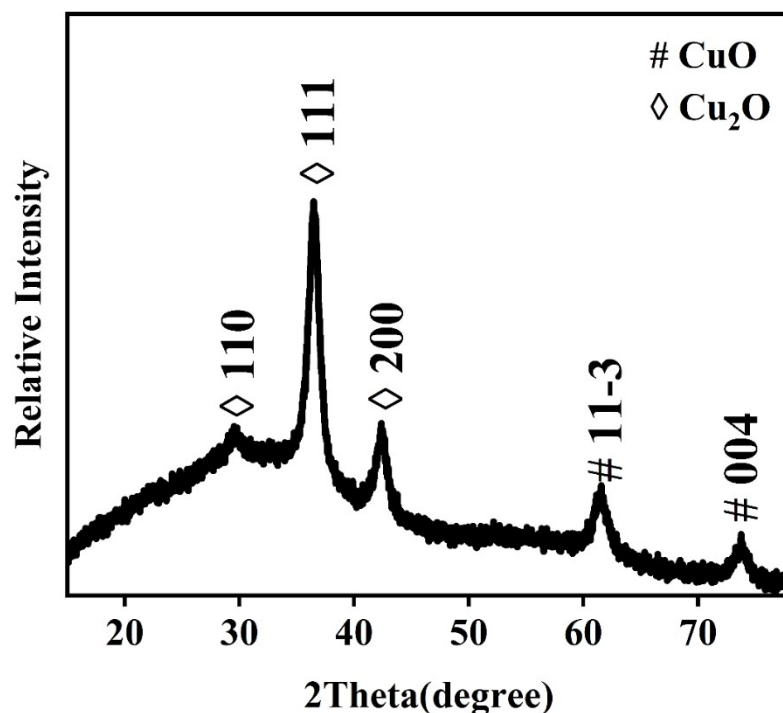

Fig. S1 XRD patterns of  $\text{Cu}_2\text{O}@CuO$  nanozymes. The main characteristic diffraction peaks of  $\text{Cu}_2\text{O}@CuO$  nanozymes at  $29.6^\circ$ ,  $36.4^\circ$ , and  $42.3^\circ$  agreed well with the (110), (111), and (200) reflections of  $\text{Cu}_2\text{O}$  (JCPDS no. 05-0667), which indicated that the nanozymes contained of  $\text{Cu}_2\text{O}$ . Moreover, two XRD peaks located at  $61.3^\circ$ , and  $73.5^\circ$  were indexed to (11-3) and (004) reflections of  $\text{CuO}$  (JCPDS no. 48-1548), which indicated that the nanozymes included  $\text{CuO}$ .

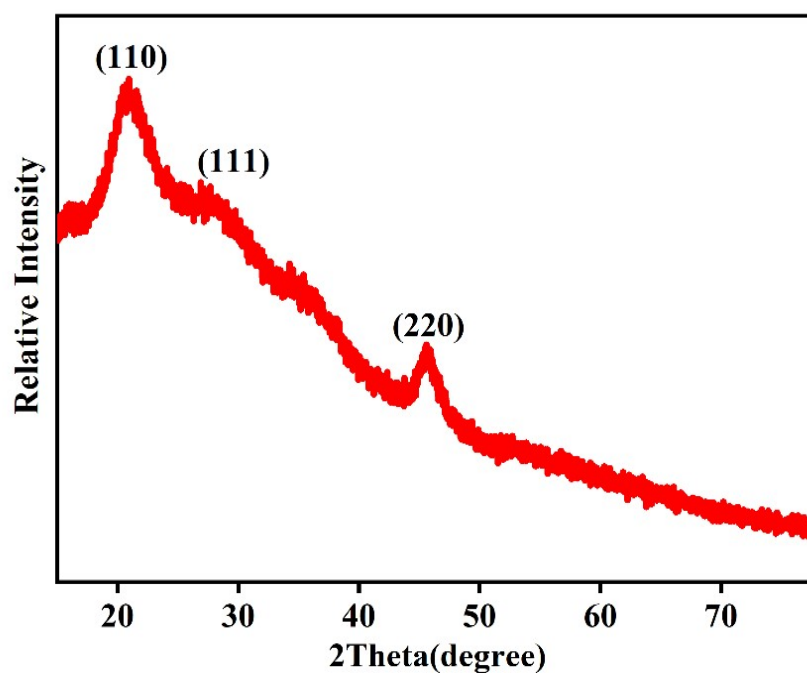

Fig. S2 XRD patterns of  $\text{Cu}@Cu_2\text{S}$  nanozymes. The XRD peaks at  $22.6^\circ$ ,  $27.8^\circ$  and  $46.1^\circ$  of  $\text{Cu}@Cu_2\text{S}$  nanozymes were indexed to the (110), (111) and (220) of the face-centered cubic

(fcc) form of  $\text{Cu}_2\text{S}$  (JCPDS no. 53-0522), which illustrated that the nanozymes composed mainly of  $\text{Cu}_2\text{S}$ .

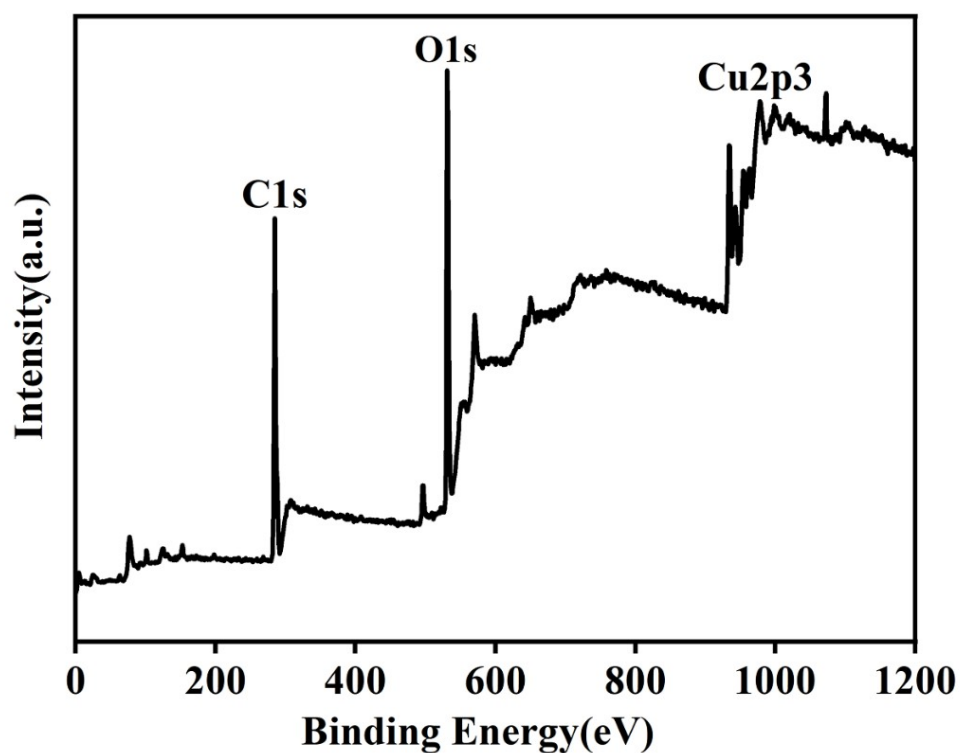

Fig. S3 XPS spectrum of  $\text{Cu}_2\text{O}@\text{CuO}$  nanozymes

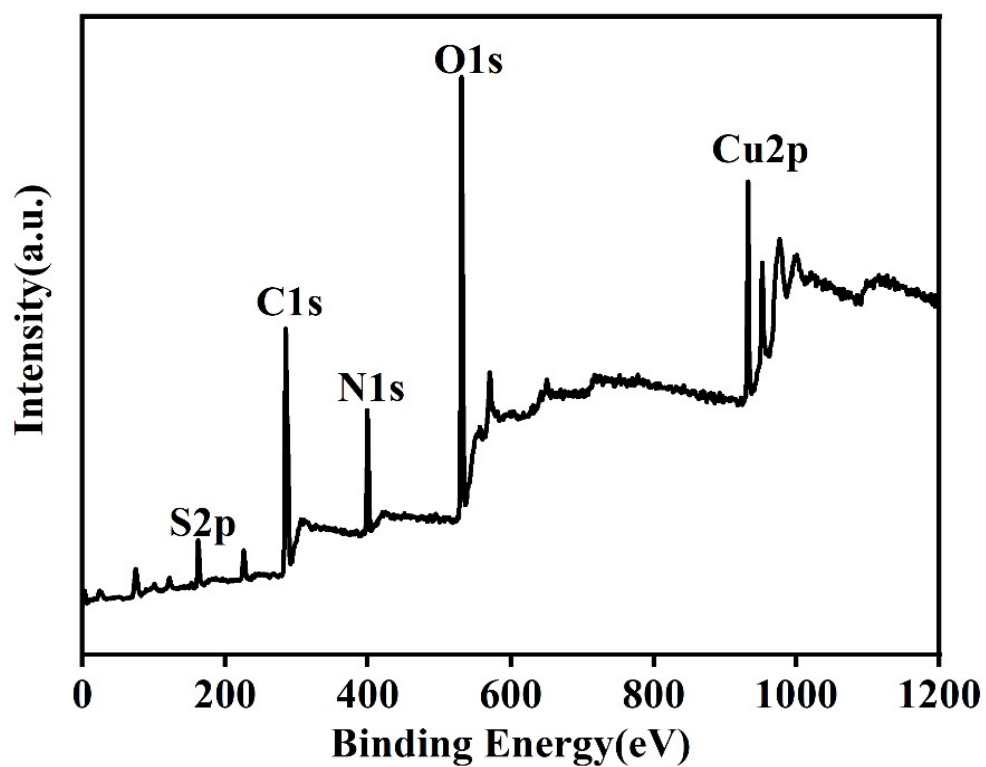

Fig. S4 XPS spectrum of  $\text{Cu}@\text{Cu}_2\text{S}$  nanozymes

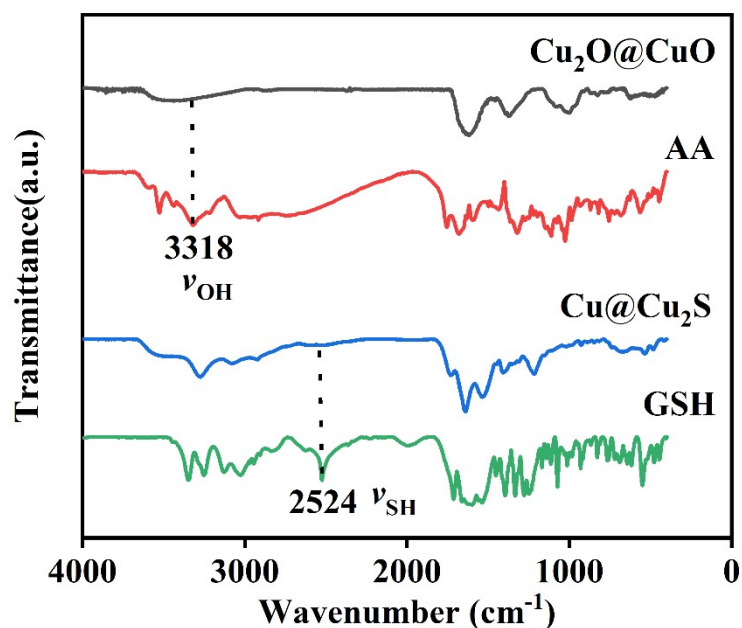

Fig. S5 FTIR spectra of  $\text{Cu}_2\text{O@CuO}$  nanozymes, AA,  $\text{Cu@Cu}_2\text{S}$  nanozymes, and GSH. Some functional groups of AA were found on the surface of the  $\text{Cu}_2\text{O@CuO}$  nanozymes, and the vibration intensity of O–H bond at  $3318 \text{ cm}^{-1}$  disappeared, verifying that AA molecules bind onto the  $\text{Cu}_2\text{O@CuO}$  nanozymes through Cu–O bonds. For  $\text{Cu@Cu}_2\text{S}$  nanozymes, the vibration intensity of S–H bond at  $2524 \text{ cm}^{-1}$  disappeared, which could be attributed to the GSH anchoring at the nanomaterial surface through Cu–S bonding.

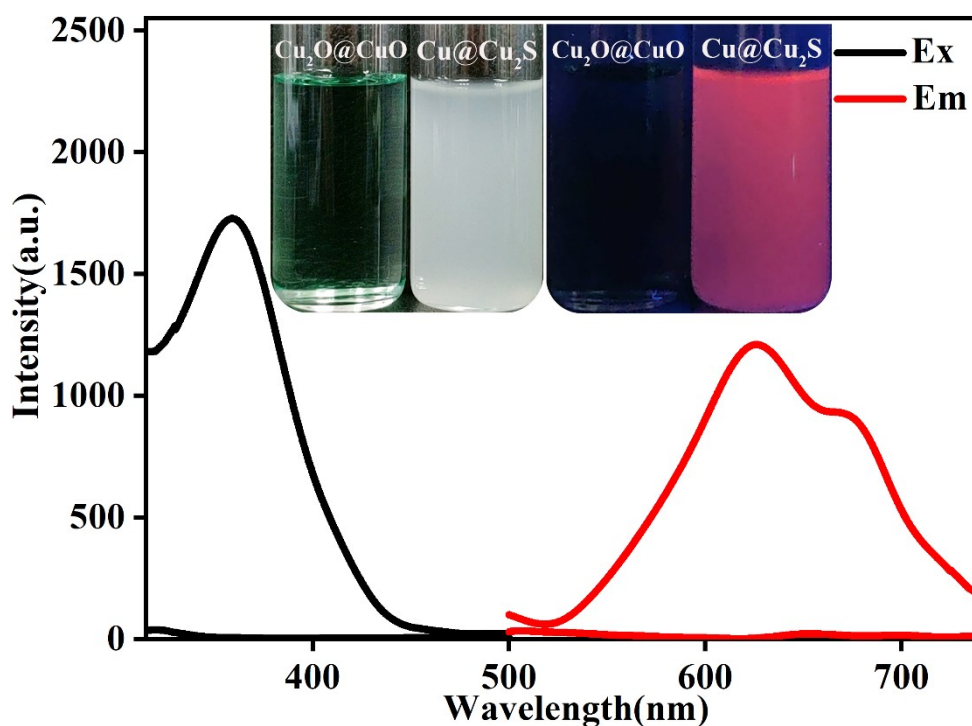

Fig. S6 Excitation and emission spectra of  $\text{Cu}_2\text{O@CuO}$  and  $\text{Cu@Cu}_2\text{S}$ , Inset: Photo of  $\text{Cu}_2\text{O@CuO}$  and  $\text{Cu@Cu}_2\text{S}$  (right), and their fluorescent photo under 365-nm UV light



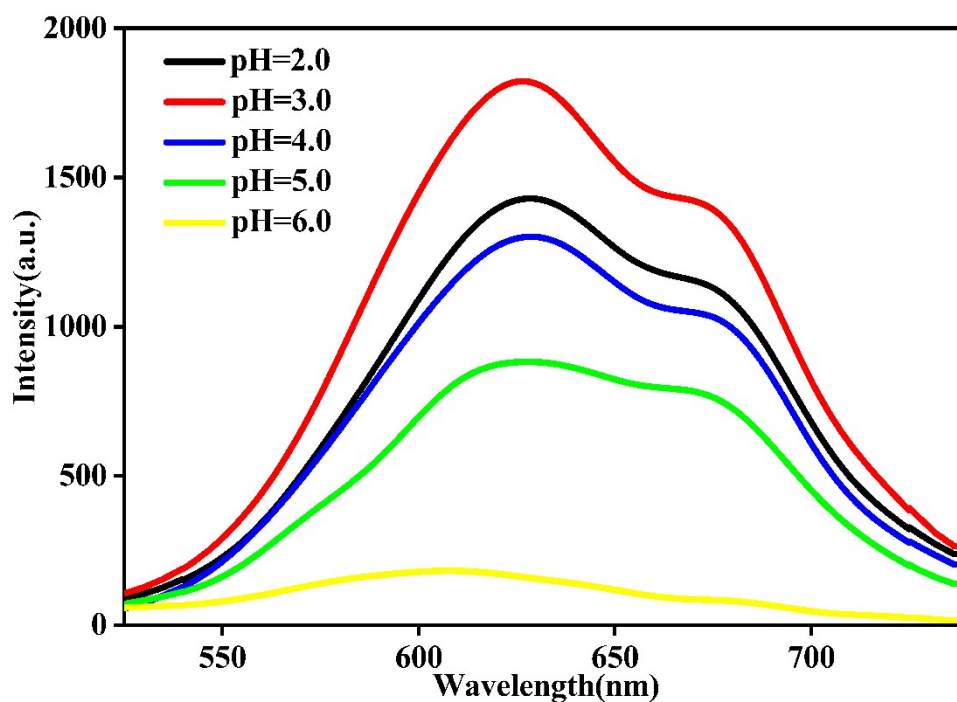

Fig. S7 Luminescence spectra of Cu@Cu<sub>2</sub>S aggregates at different pH values. The Cu@Cu<sub>2</sub>S exhibit a pH-responsive emission, the fluorescence intensity increased significantly with the pH decreased from 6.0 to 3.0. These indicate that a variation in the pH of an aqueous solution changes the structure of Cu@Cu<sub>2</sub>S from monodispersed states to aggregates.

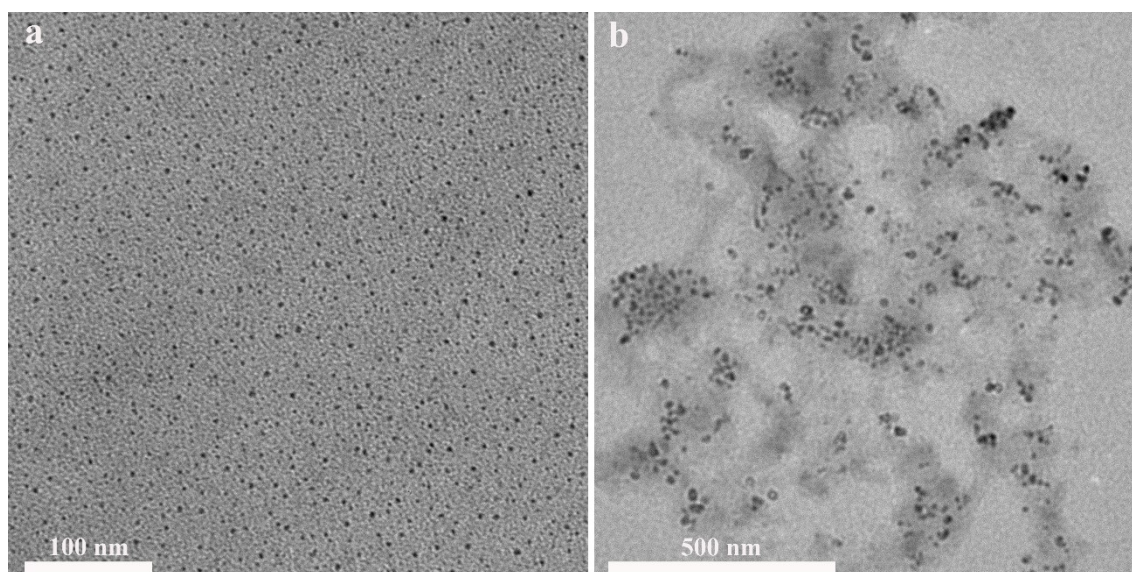

Fig. S8 TEM image of Cu@Cu<sub>2</sub>S nanozymes at: a) pH 6.0, and b) pH 3.0. The aggregates of nanozymes at pH 3.0 are more than that at pH 6.0. Therefore, it is reasonable to believe that the as-prepared Cu@Cu<sub>2</sub>S have a pH-responsive aggregation-induced emission.

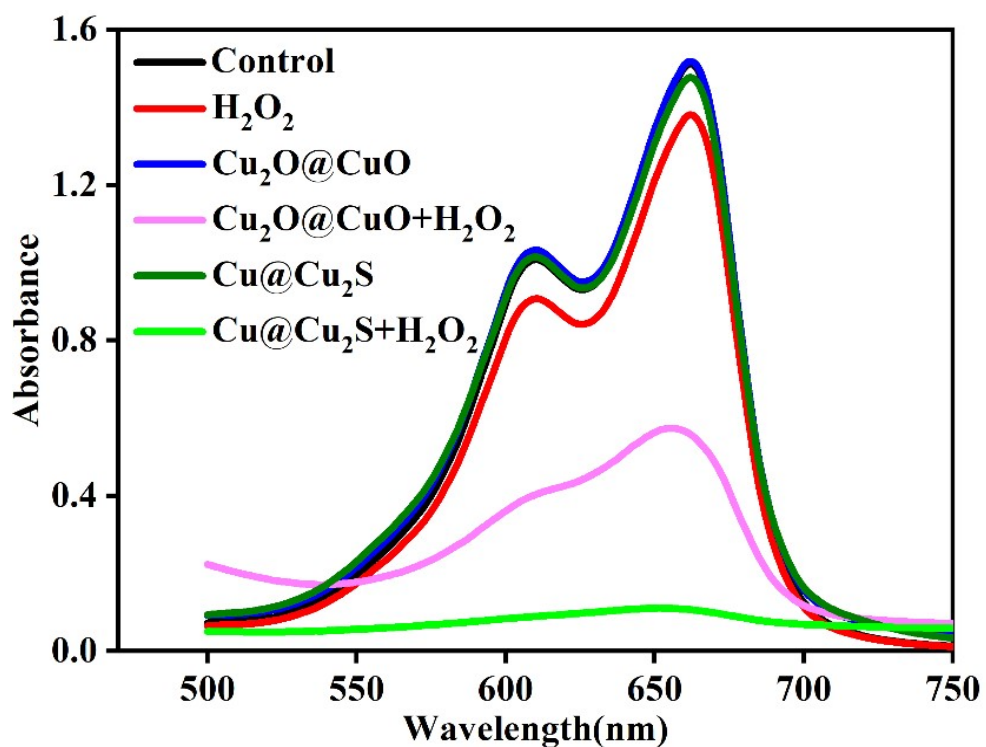

Fig. S9 Peroxidase-like activity of Cu<sub>2</sub>O@CuO and Cu@Cu<sub>2</sub>S with MB degradation

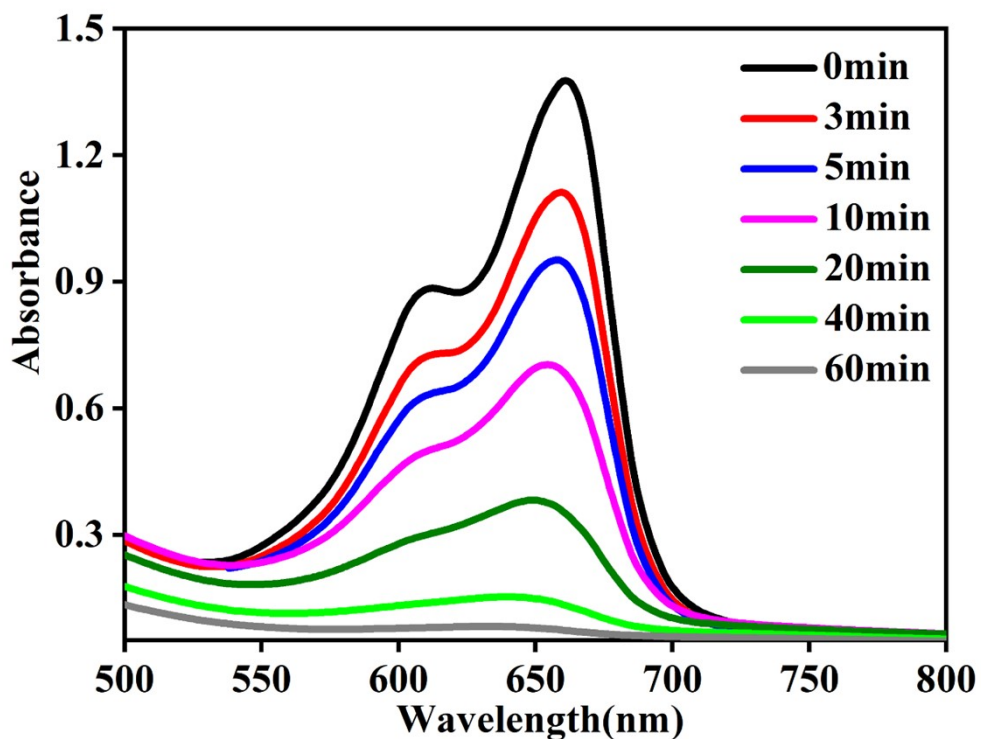

Fig. S10 Degradation process of MB in the presence of Cu<sub>2</sub>O@CuO and H<sub>2</sub>O<sub>2</sub>

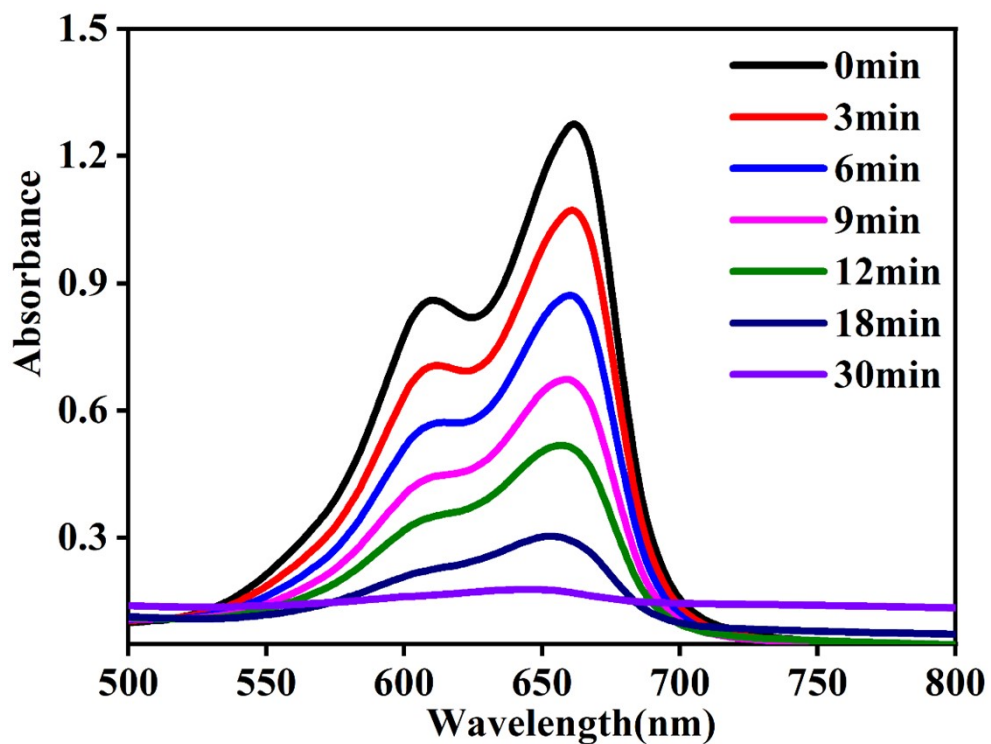

Fig. S11 Degradation process of MB in the presence of Cu@Cu<sub>2</sub>S and H<sub>2</sub>O<sub>2</sub>

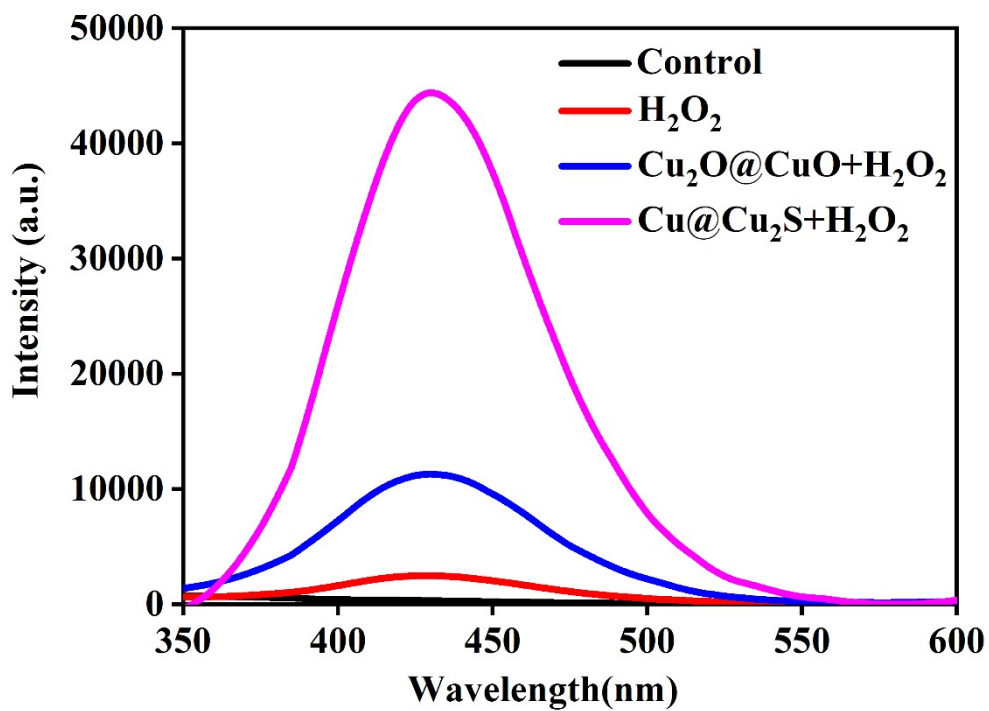

Fig. S12 Peroxidase-like activity of Cu<sub>2</sub>O@CuO and Cu@Cu<sub>2</sub>S with *p*TA oxidation and H<sub>2</sub>O<sub>2</sub>

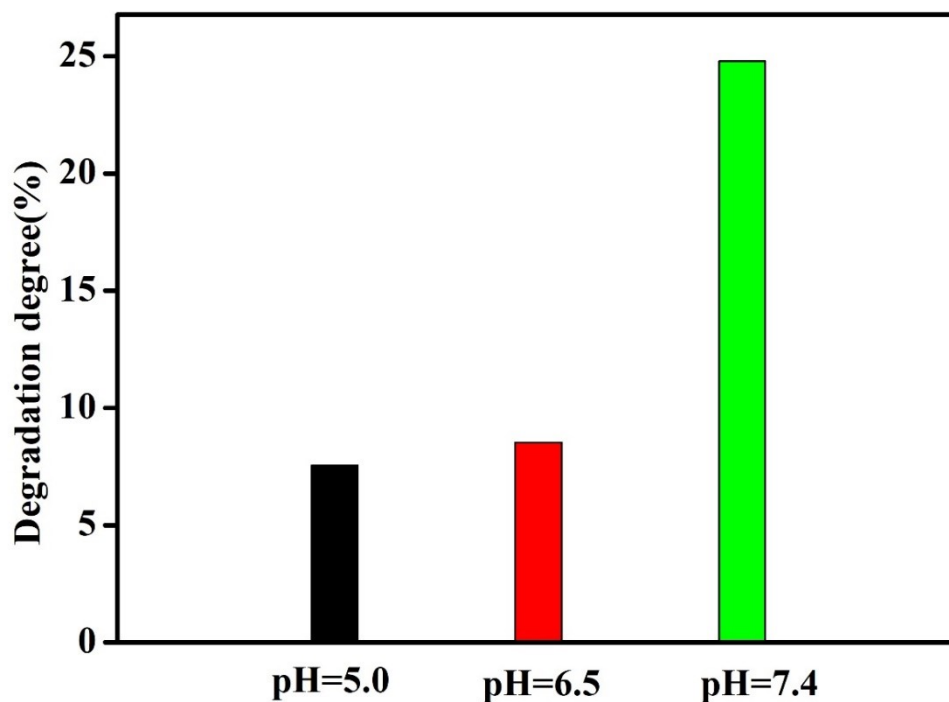

Fig. S13 MB degradation at different pH conditions in the presence of  $\text{Cu}_2\text{O}@\text{CuO}$  and  $\text{H}_2\text{O}_2$ . The reaction speed of MB degradation increased with increasing of pH values, and the rate in pH 7.4 raised by 26.8% over that in pH 5.0.

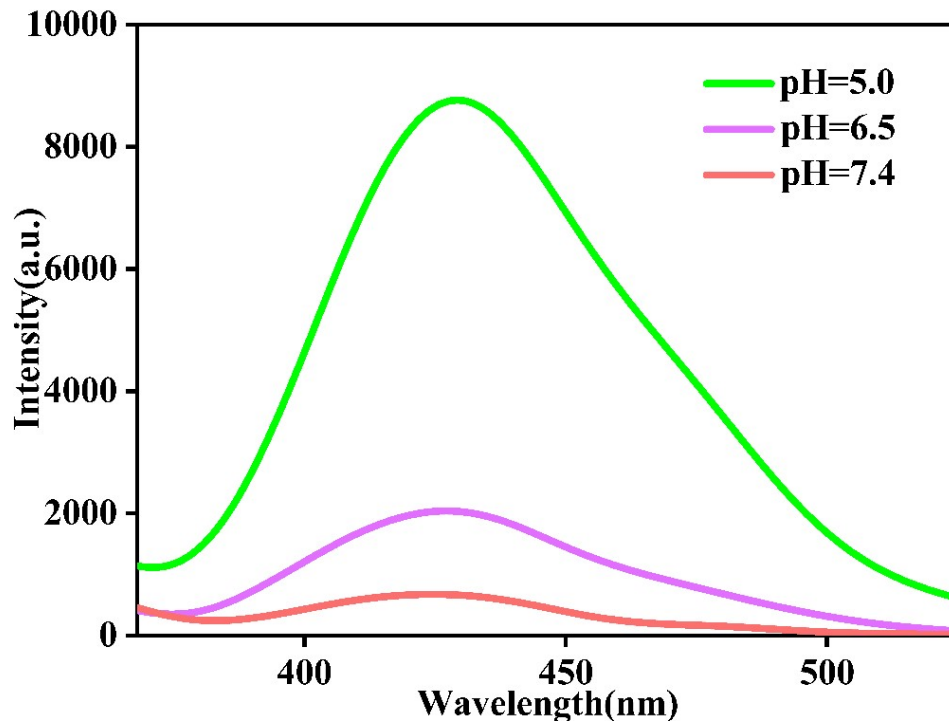

Fig. S14 Fluorescent spectra of *p*TA oxidation at different pH conditions in the presence of  $\text{Cu}_2\text{O}@\text{CuO}$  and  $\text{H}_2\text{O}_2$ . The oxidation of *p*TA had dramatically declined with the increase of pH values, and the rate in pH 7.4 was only a tenth of the speed in pH 5.0.

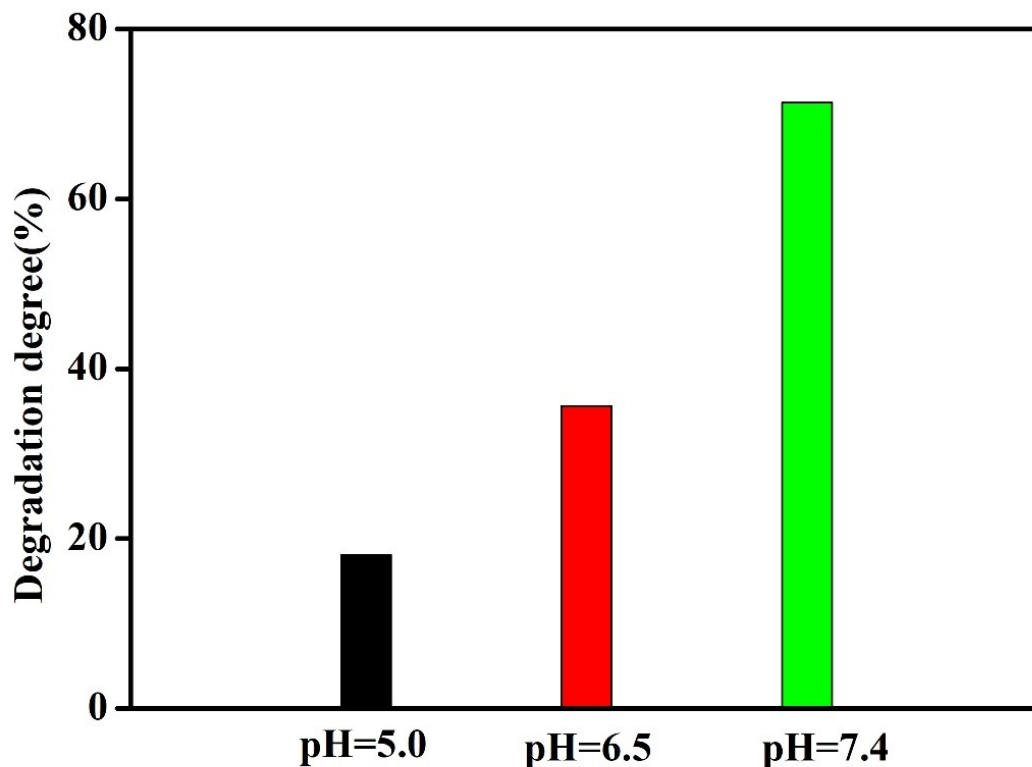

Fig. S15 MB degradation at different pH conditions in the presence of Cu@Cu<sub>2</sub>S and H<sub>2</sub>O<sub>2</sub>. The reaction rates of MB degradation also increased with the increasing of pH values, and the rate in pH 7.4 raised four times as compared to that in pH 5.

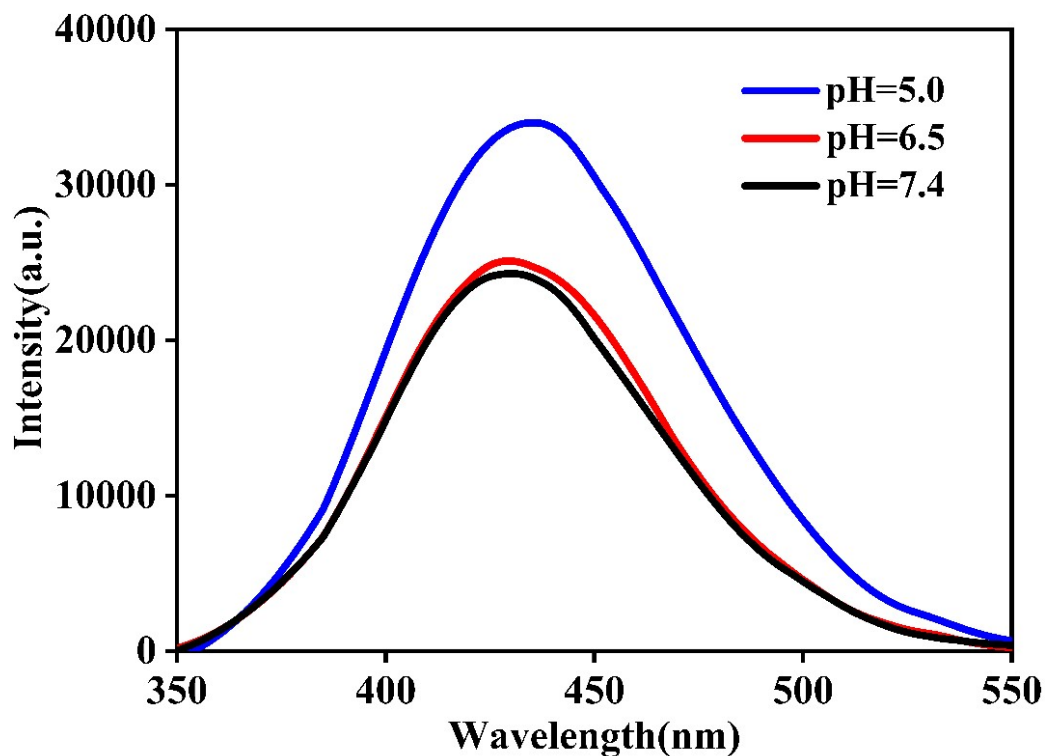

Fig. S16 Fluorescent spectra of *p*TA oxidation at different pH conditions in the presence of Cu@Cu<sub>2</sub>S and H<sub>2</sub>O<sub>2</sub>. *p*TA oxidation in pH 7.4 remained at 73% of the rates in pH 5.0.



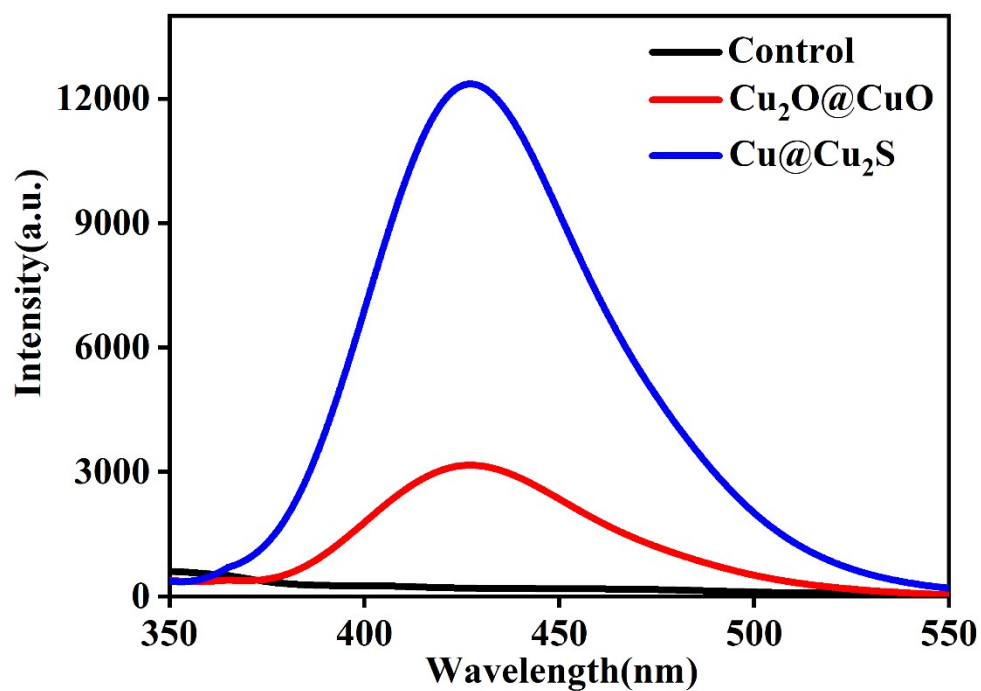

Fig. S17 oxidase-like activity of Cu<sub>2</sub>O@CuO and Cu@Cu<sub>2</sub>S with pTA oxidation.

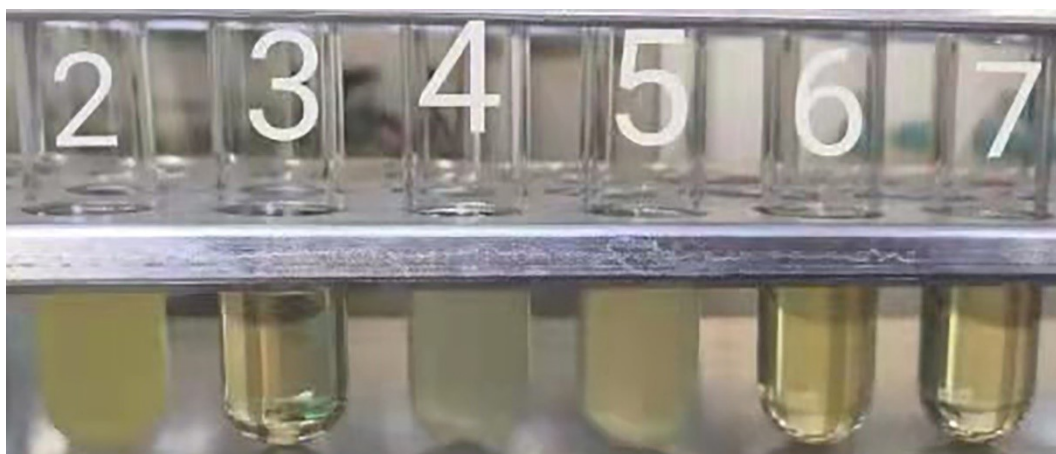

Fig. S18 Turbidity changes of *S. aureus* with Cu<sub>2</sub>O@CuO, Cu@Cu<sub>2</sub>S and antibiotics in test tubes: 2: Control; 3: Antibiotics; 4, 5: Cu<sub>2</sub>O@CuO; 6, 7: Cu@Cu<sub>2</sub>S

Table S1 OD<sub>600</sub> values of the above-mentioned *S. aureus*' turbidity

| Sample            | Control | Antibiotics | Cu <sub>2</sub> O@CuO |       | Cu@Cu <sub>2</sub> S |       |
|-------------------|---------|-------------|-----------------------|-------|----------------------|-------|
| OD <sub>600</sub> | 2.029   | 0.016       | 0.291                 | 0.796 | 0.007                | 0.009 |

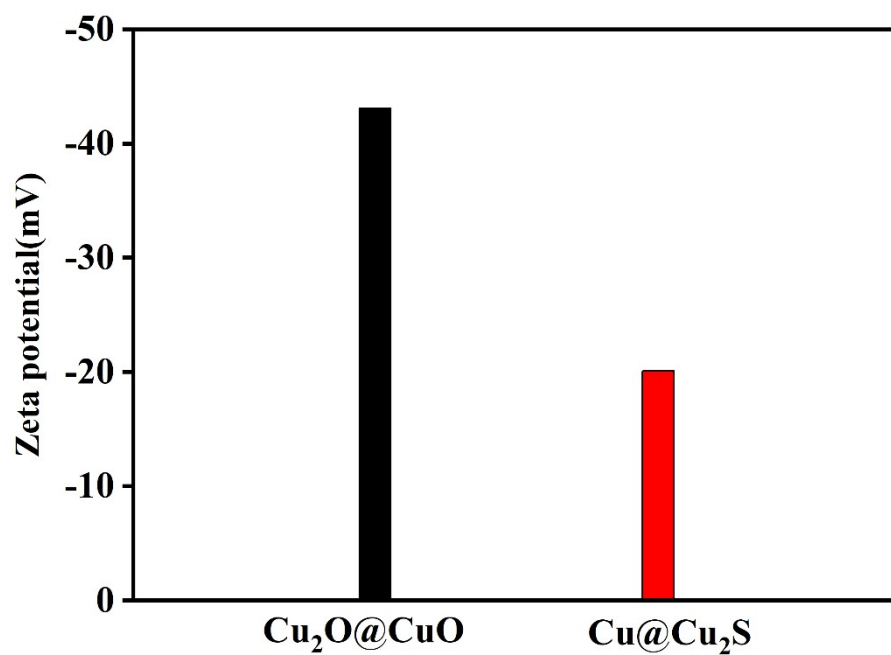

Fig. S19 Zeta potential of  $\text{Cu}_2\text{O}@CuO$  and  $\text{Cu}@Cu_2S$

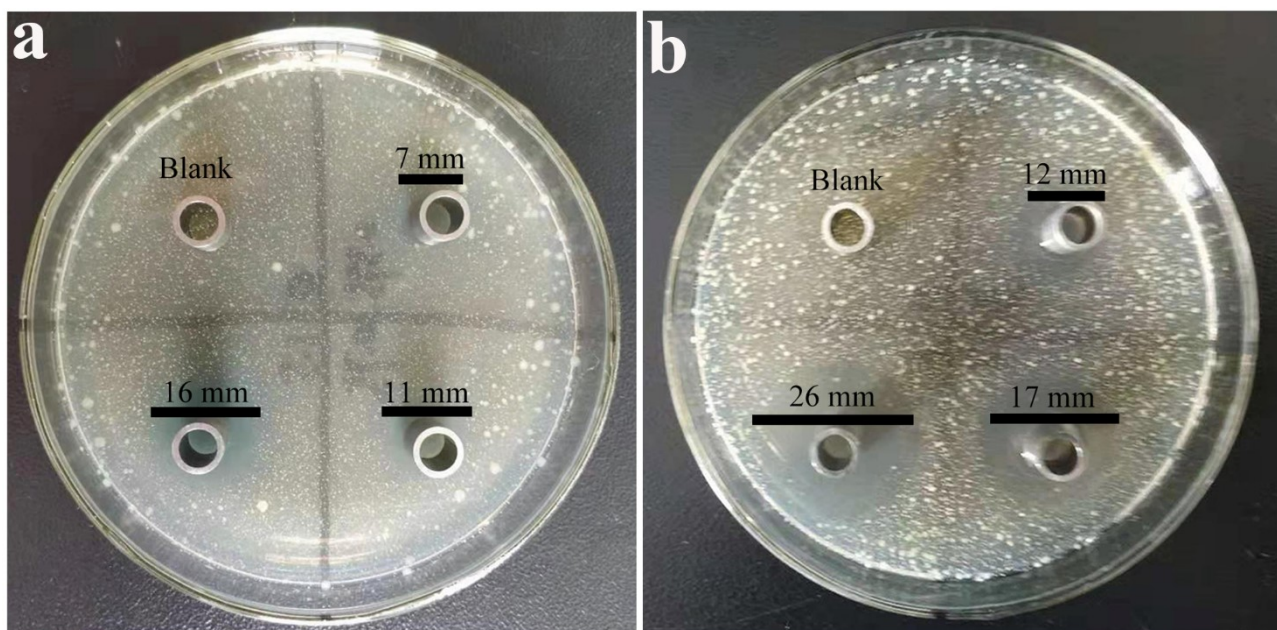

Fig. S20 (a) and (b) Antibacterial zone test against *E. coli* and *S. aureus*

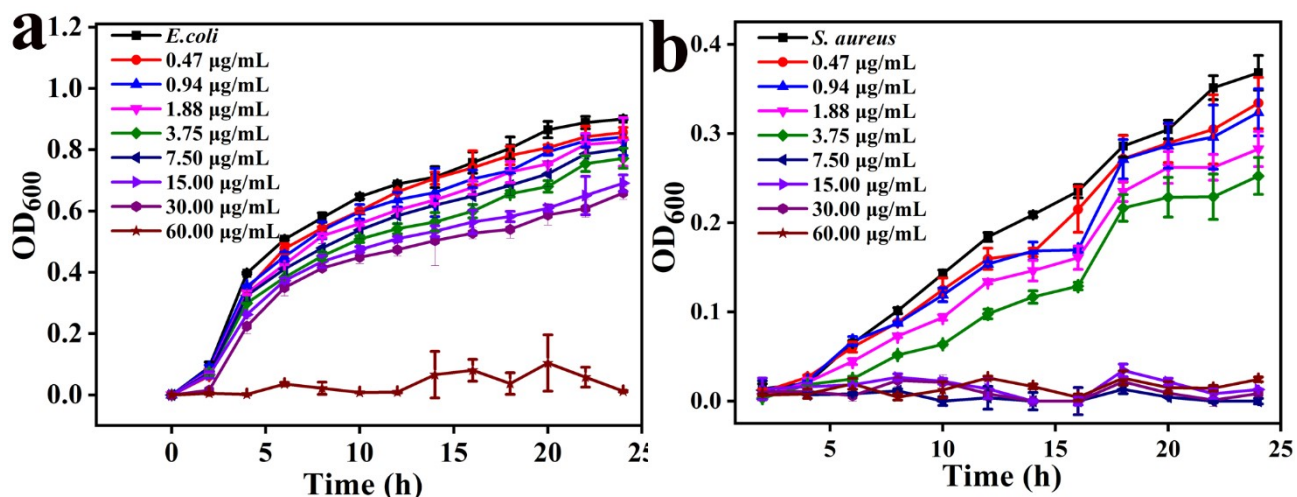

Fig. S21 (a) and (b) Reproduction curves of *E. coli* and *S. aureus* at different concentrations of Cu@Cu<sub>2</sub>S nanozymes

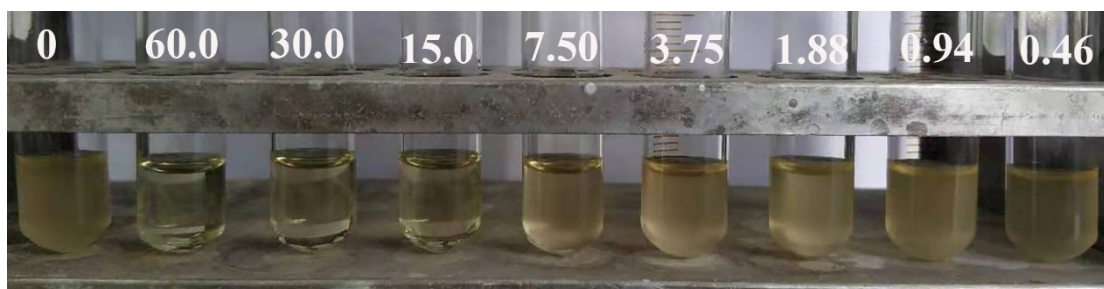

Fig. S22 MICs testing for *S. aureus* with Cu@Cu<sub>2</sub>S nanodots in test tubes

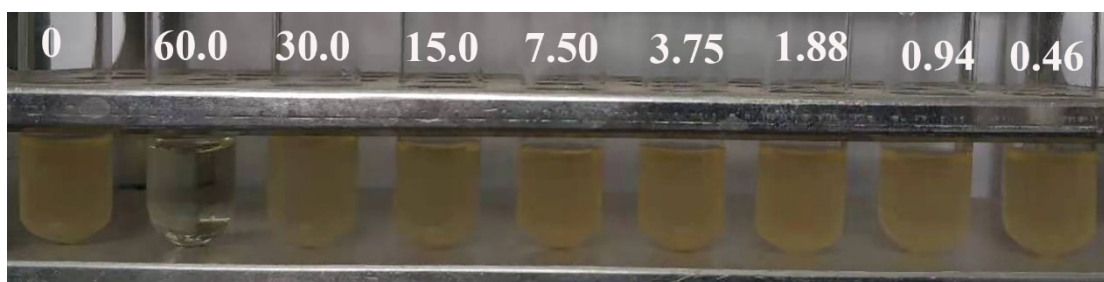

Fig. S23 MIC testing for *E. coli* with Cu@Cu<sub>2</sub>S nanodots in test tubes
